# Supplementary material for: Deep Learning Supplants Visual Analysis by Experienced Operators for the Diagnosis of Cardiac Amyloidosis by Cine-CMR
Source: MDPI journal article supplement (doi:10.3390/diagnostics12010069), 2021-12-29
Supplement: s1 [file s1]

**Table supp1:** Clinical and CMR characteristics of AL and TTR cardiac amyloidosis

|                               | AL           | TTR          | P      |
|-------------------------------|--------------|--------------|--------|
| N                             | 59           | 38           |        |
| Age (years)                   | 72.39±9.09   | 74.12±9.26   | 0.40   |
| Sex (F/M)                     | 19/40        | 4/34         | 0.005  |
| Weight (kg)                   | 68.60±15.47  | 76.29±14.80  | 0.024  |
| Height (m)                    | 170.14± 9.04 | 172.11±8.37  | 0.31   |
| BSA (m <sup>2</sup> )         | 1.82±0.21    | 1.91±0.18    | 0.04   |
| IVS (mm)                      | 16.74±3.07   | 20.00±3.49   | 0.0001 |
| LVMl (g/m <sup>2</sup> )      | 106.54±29.64 | 130.31±27.55 | 0.0003 |
| LVDVI (ml/m <sup>2</sup> )    | 66.47±22.86  | 74.03±21.65  | 0.12   |
| LVEF (%)                      | 59.85±9.54   | 58.20±11.26  | 0.46   |
| LA surface (cm <sup>2</sup> ) | 30.22±4.49   | 30.57±3.54   | 0.77   |
| Systolic time (ms)            | 312±44       | 333±35       | 0.076  |
| T1 (ms)                       | 1142.9±52.9  | 1141±45.3    | 0.90   |
| ECV (%)                       | 49.53±8.51   | 58.60±10.94  | <0.017 |
| N frames long axis/patient    | 2.22±1.12    | 2.28±0.78    | 0.78   |
| N frames short axis/patient   | 3.38±1.55    | 3.56±1.44    | 0.59   |
| N frames/patient              | 5.60±2.04    | 5.83±1.76    | 0.58   |
| N frame post-gadolinium       | 94/330       | 52/222       | ns     |
| Pericardial effusion          | 36 (61%)     | 7 (18%)      | 0.0004 |
| Pleural effusion              | 28 (47.5%)   | 6 (16%)      | 0.014  |
| Both effusions                | 16 (27%)     | 2 (5%)       | 0,007  |

Characteristics of patients with AL and TTR amyloidosis (same abbreviations as in table 1).
